# Supplementary material for: Sex differences in the aging human heart: decreased sirtuins, pro-inflammatory shift and reduced anti-oxidative defense
Source: PubMed Central journal article supplement (PMC6503880; doi:10.18632/aging.101881), 2019-04-08

## SUPPLEMENTARY MATERIAL

### Supplementary Figure

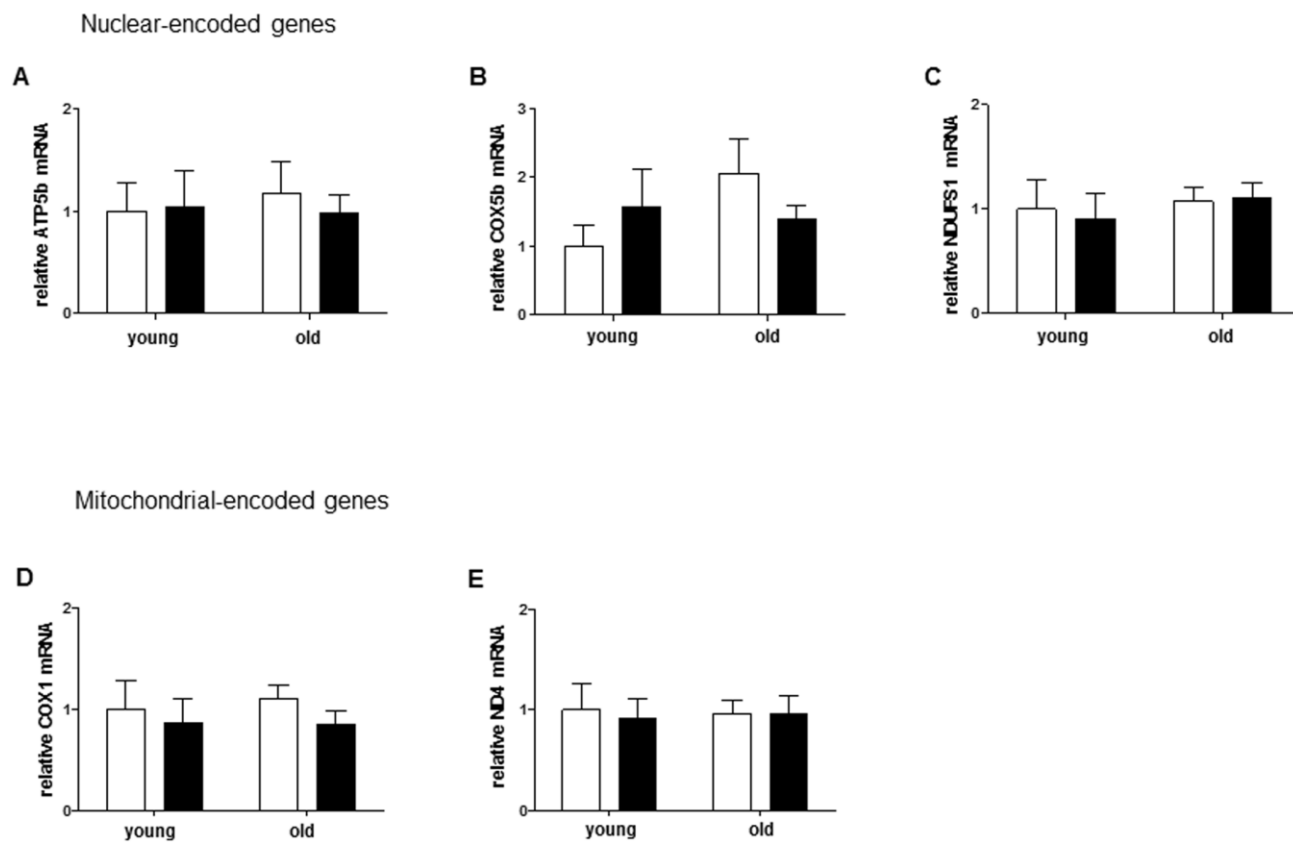

**Supplementary Figure 1. No sex- or age-dependent differences in mitochondrial biogenesis.** Relative mRNA expression of nuclear- and mitochondrial-encoded genes in non-diseased hearts in young and old men and women. Real-time analysis for the nuclear-encoded genes (A) ATP5b, (B) COX5b and (C) NDUFS1 and mitochondrial-encoded genes (D) COX1 and (E) ND4. Data are shown as the mean  $\pm$  SEM (n= 6-9/group).

# Original Blots

## Original Blot 1.

|                                          |      |      |      |      |      |      |      |      |      |      |      |      |      |      |      |      |      |      |      |      |      |      |      |      |      |      |      |      |      |      |    |    |    |    |
|------------------------------------------|------|------|------|------|------|------|------|------|------|------|------|------|------|------|------|------|------|------|------|------|------|------|------|------|------|------|------|------|------|------|----|----|----|----|
| 1                                        | 2    | 3    | 4    | 5    | 6    | 7    | 8    | 9    | 10   | 11   | 12   | 13   | 14   | 15   | 16   | 17   | 18   | 19   | 20   | 21   | 22   | 23   | 24   | 25   | 26   | 27   | 28   | 29   | 30   | 31   | 32 | 33 | 34 | 35 |
| M                                        | 1945 | 1650 | 1940 | 1941 | 1942 | 1944 | 1946 | 1961 | 1964 | 1957 | 1958 | 1959 | 1960 | 1963 | 1947 | 1948 | 1950 | 1951 | 1952 | 1953 | 1954 | 1955 | 1956 | 1790 | 1968 | 1969 | 1970 | 1971 | 1972 | 1973 | M  | M  | M  |    |
| WB 07.06.16                              |      |      |      |      |      |      |      |      |      |      |      |      |      |      |      |      |      |      |      |      |      |      |      |      |      |      |      |      |      |      |    |    |    |    |
| 20µg / lane; 6%; nitrocellulose membrane |      |      |      |      |      |      |      |      |      |      |      |      |      |      |      |      |      |      |      |      |      |      |      |      |      |      |      |      |      |      |    |    |    |    |

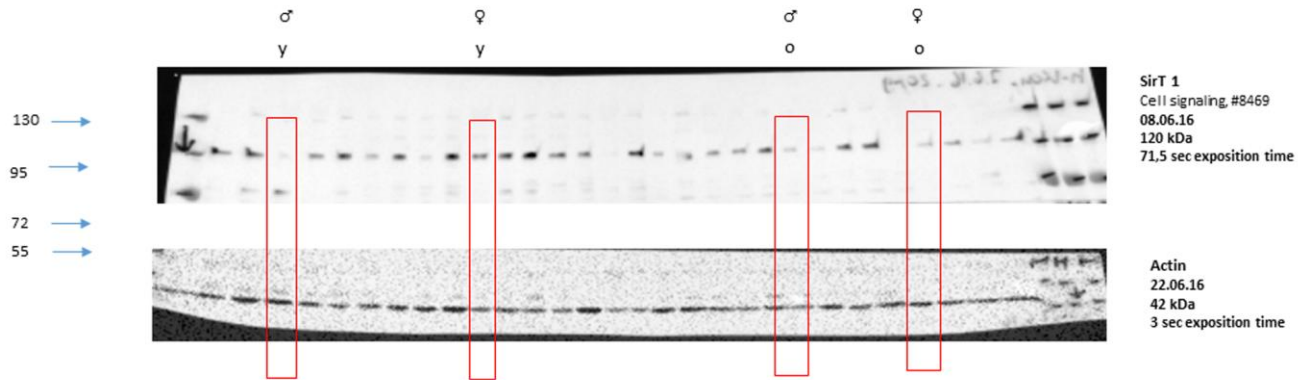

## Original Blot 2.

|                                           |      |      |      |      |      |      |      |      |      |      |      |      |      |      |      |      |      |      |      |      |      |      |      |      |      |      |      |      |      |      |    |    |    |    |
|-------------------------------------------|------|------|------|------|------|------|------|------|------|------|------|------|------|------|------|------|------|------|------|------|------|------|------|------|------|------|------|------|------|------|----|----|----|----|
| 1                                         | 2    | 3    | 4    | 5    | 6    | 7    | 8    | 9    | 10   | 11   | 12   | 13   | 14   | 15   | 16   | 17   | 18   | 19   | 20   | 21   | 22   | 23   | 24   | 25   | 26   | 27   | 28   | 29   | 30   | 31   | 32 | 33 | 34 | 35 |
| M                                         | 1945 | 1650 | 1940 | 1941 | 1942 | 1944 | 1946 | 1961 | 1964 | 1957 | 1958 | 1959 | 1960 | 1963 | 1947 | 1949 | 1950 | 1951 | 1952 | 1953 | 1954 | 1955 | 1956 | 1790 | 1968 | 1969 | 1970 | 1971 | 1972 | 1973 | M  | M  |    |    |
| WB 18.02.16                               |      |      |      |      |      |      |      |      |      |      |      |      |      |      |      |      |      |      |      |      |      |      |      |      |      |      |      |      |      |      |    |    |    |    |
| 15µg / lane; 10%; nitrocellulose membrane |      |      |      |      |      |      |      |      |      |      |      |      |      |      |      |      |      |      |      |      |      |      |      |      |      |      |      |      |      |      |    |    |    |    |

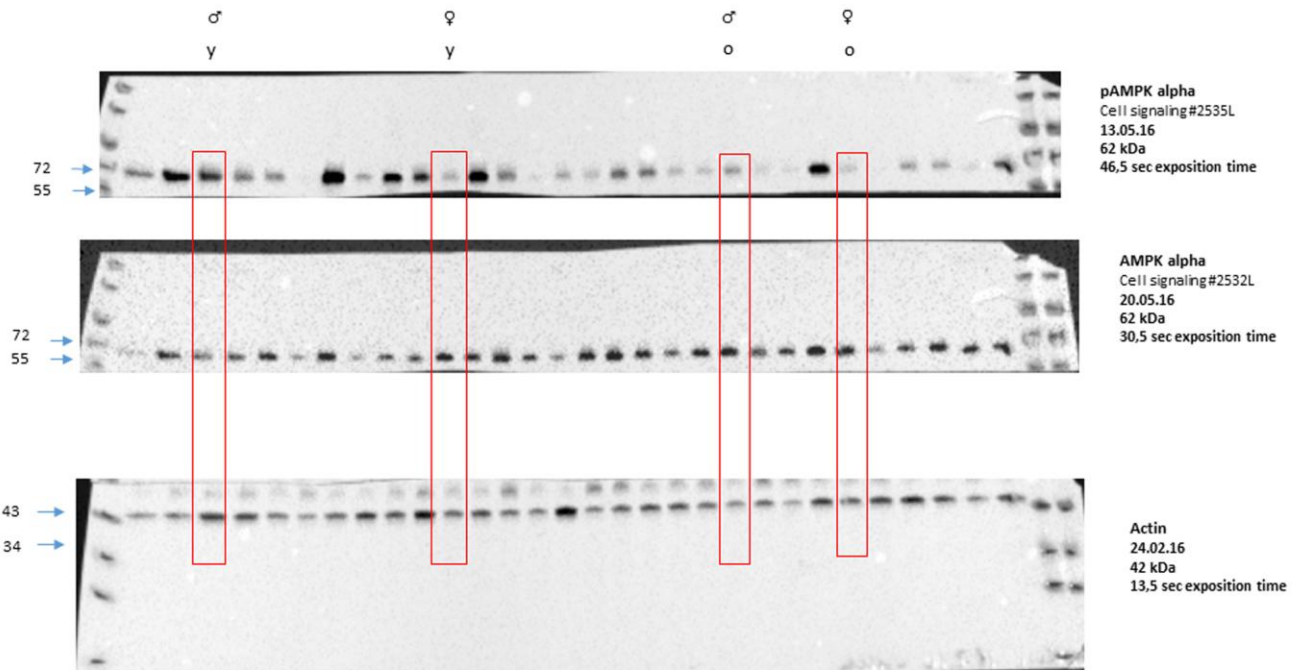

**Original Blot 3.**

|   |      |      |      |      |      |      |      |      |      |      |      |      |      |      |      |      |      |      |      |      |      |      |      |      |      |      |      |      |      |      |    |    |    |    |
|---|------|------|------|------|------|------|------|------|------|------|------|------|------|------|------|------|------|------|------|------|------|------|------|------|------|------|------|------|------|------|----|----|----|----|
| 1 | 2    | 3    | 4    | 5    | 6    | 7    | 8    | 9    | 10   | 11   | 12   | 13   | 14   | 15   | 16   | 17   | 18   | 19   | 20   | 21   | 22   | 23   | 24   | 25   | 26   | 27   | 28   | 29   | 30   | 31   | 32 | 33 | 34 | 35 |
| M | 1945 | 1650 | 1940 | 1941 | 1942 | 1944 | 1946 | 1961 | 1964 | 1957 | 1958 | 1959 | 1960 | 1963 | 1947 | 1949 | 1950 | 1951 | 1952 | 1953 | 1954 | 1955 | 1956 | 1790 | 1968 | 1969 | 1970 | 1971 | 1972 | 1973 | M  | M  |    |    |

WB 18.02.16  
15µg/lane; 10%; nitocellulose membrane

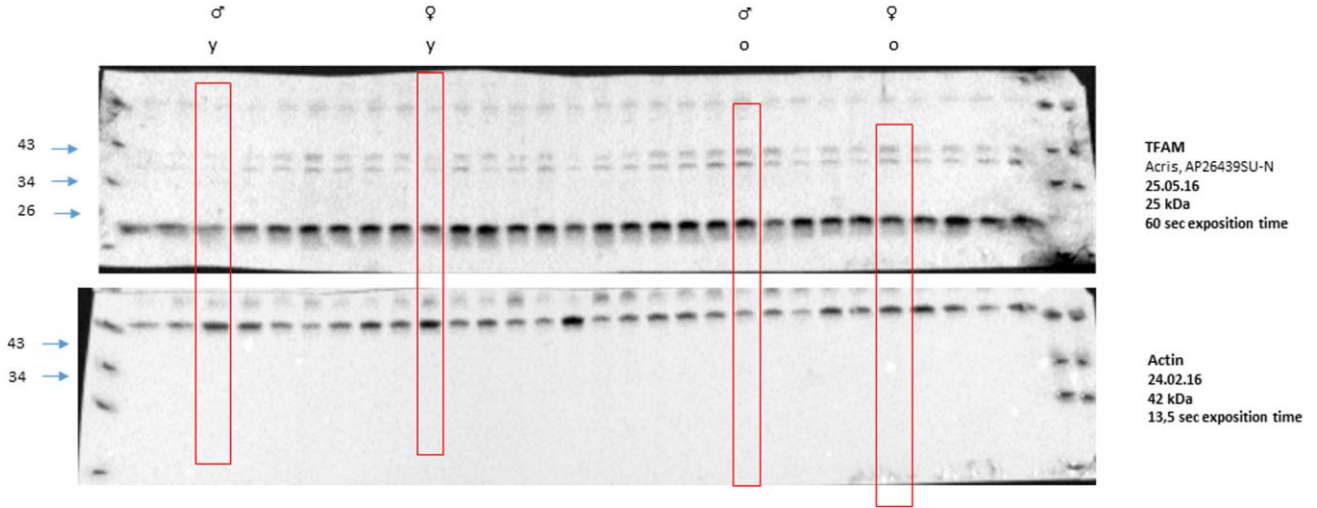

**Original Blot 4.**

|   |      |      |      |      |      |      |      |      |      |      |      |      |      |      |      |      |      |      |      |      |      |      |      |      |      |      |      |      |      |      |    |    |  |
|---|------|------|------|------|------|------|------|------|------|------|------|------|------|------|------|------|------|------|------|------|------|------|------|------|------|------|------|------|------|------|----|----|--|
| 1 | 2    | 3    | 4    | 5    | 6    | 7    | 8    | 9    | 10   | 11   | 12   | 13   | 14   | 15   | 16   | 17   | 18   | 19   | 20   | 21   | 22   | 23   | 24   | 25   | 26   | 27   | 28   | 29   | 30   | 31   | 32 | 33 |  |
| M | 1945 | 1650 | 1940 | 1941 | 1942 | 1944 | 1946 | 1961 | 1964 | 1957 | 1958 | 1959 | 1960 | 1963 | 1947 | 1949 | 1950 | 1951 | 1952 | 1953 | 1954 | 1955 | 1956 | 1790 | 1968 | 1969 | 1970 | 1971 | 1972 | 1973 | M  | M  |  |

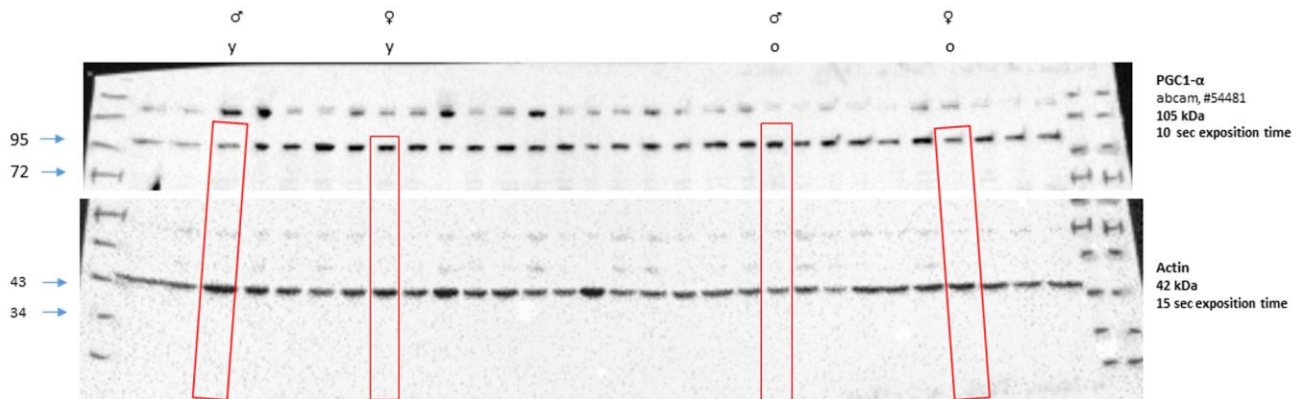

**Original Blot 5.**

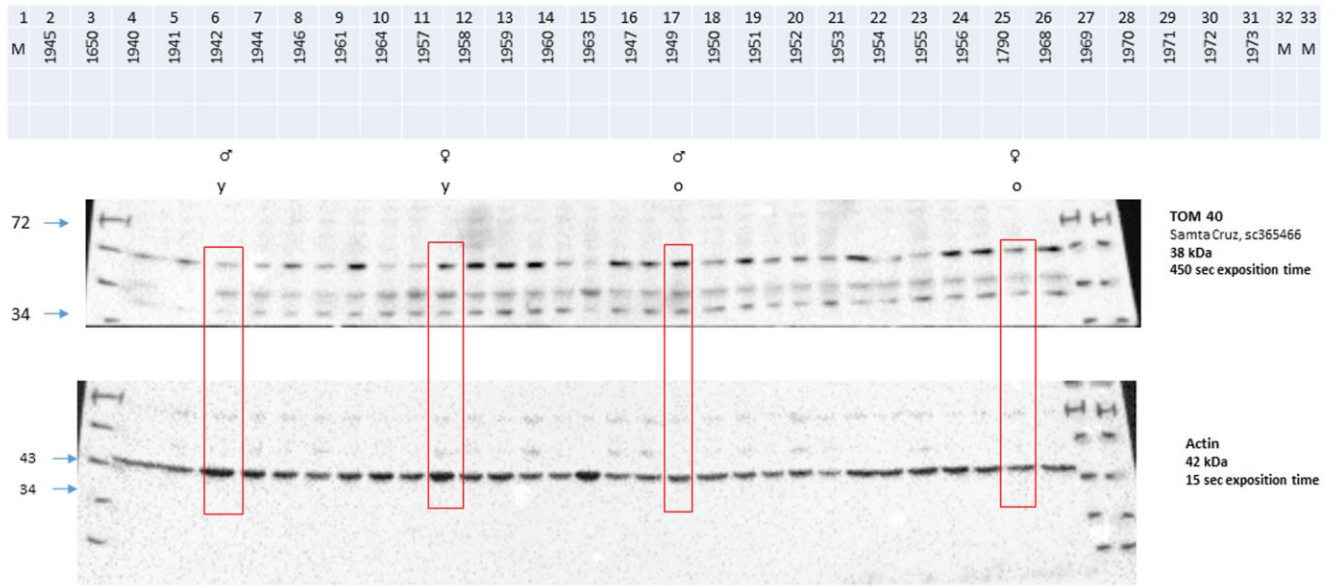

**Original Blot 6.**

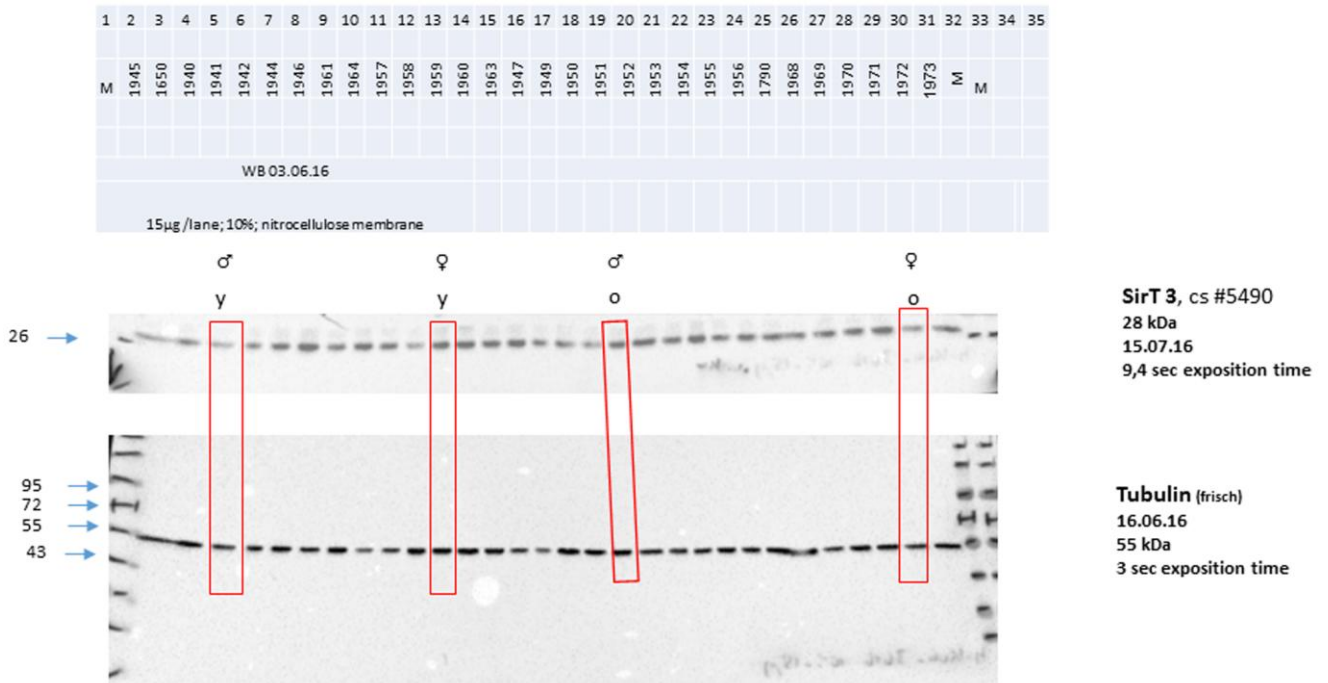

**Original Blot 7.**

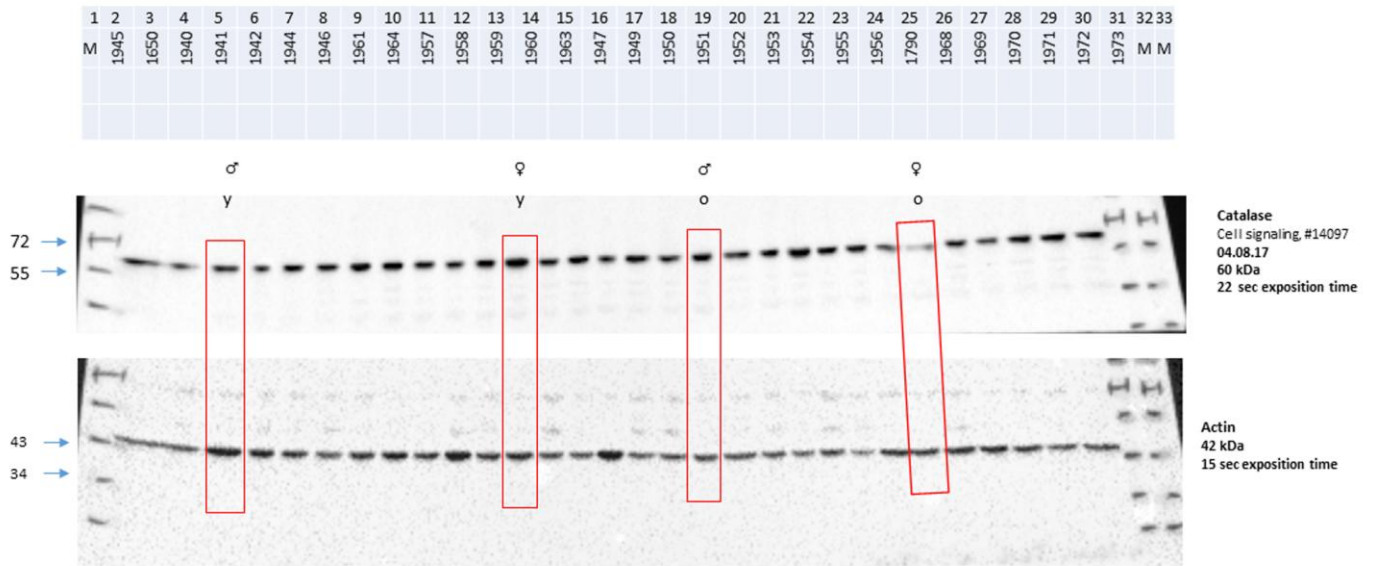

**Original Blot 8.**

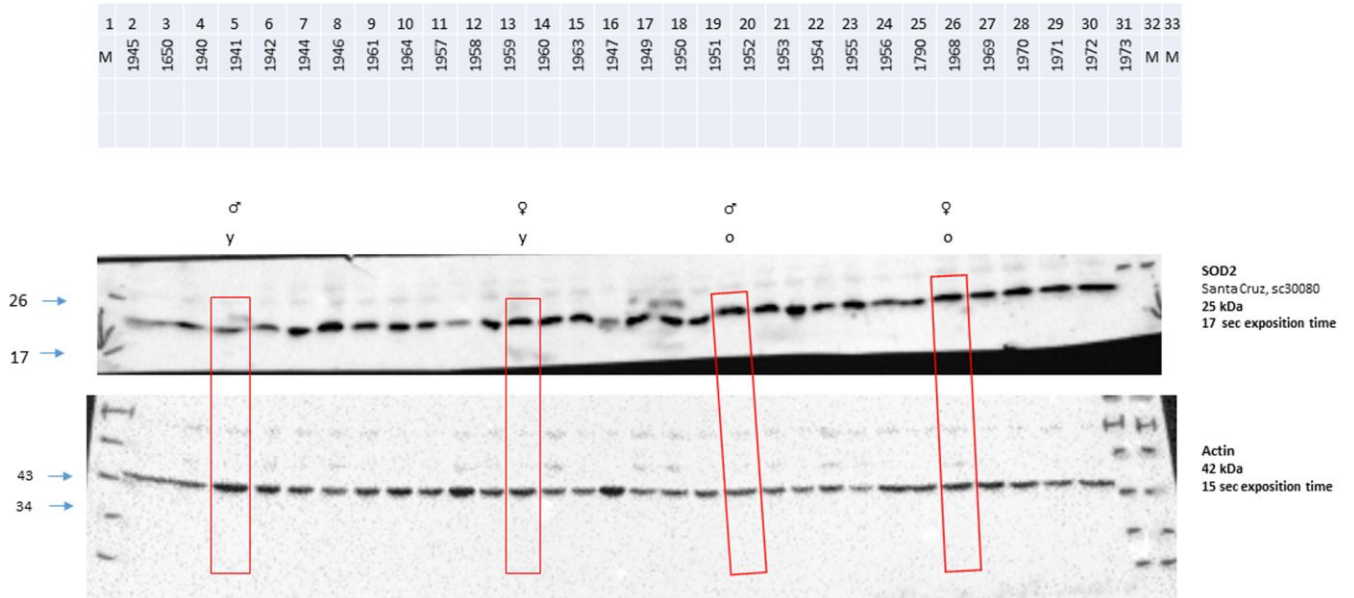

Supplement: aging-11-101881-s001.pdf [file aging-11-101881-s001.pdf]
